# Supplementary material
Source: PubMed Central journal article supplement (PMC514517)

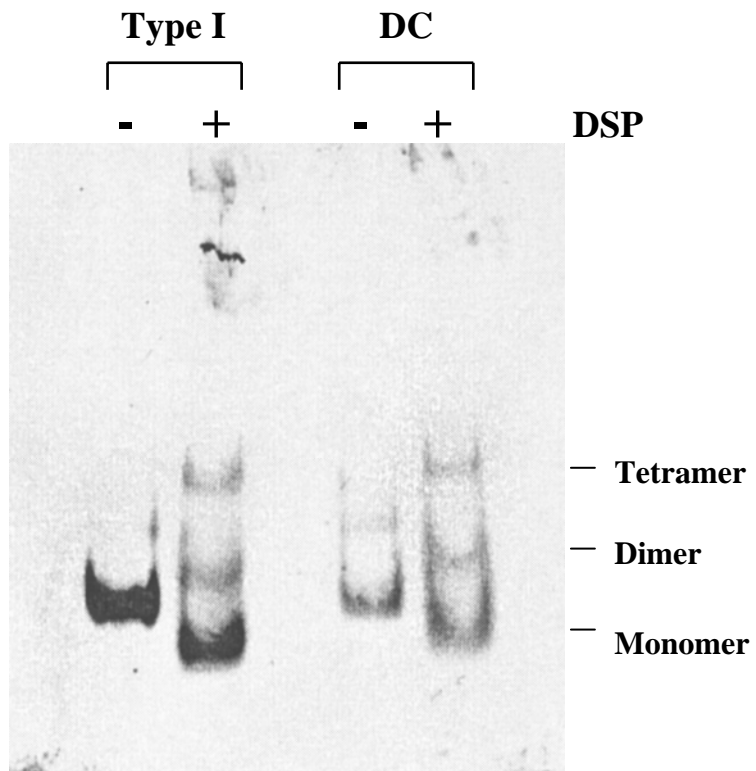

**Supplementary Figure 1**

Supplement: 7600344s2.pdf [file 7600344s2.pdf]

**A**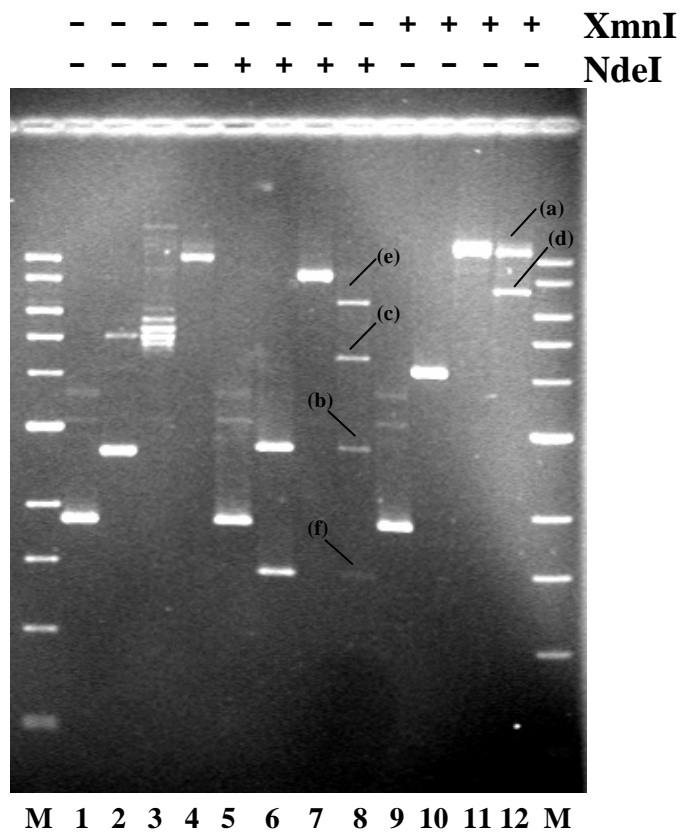**B**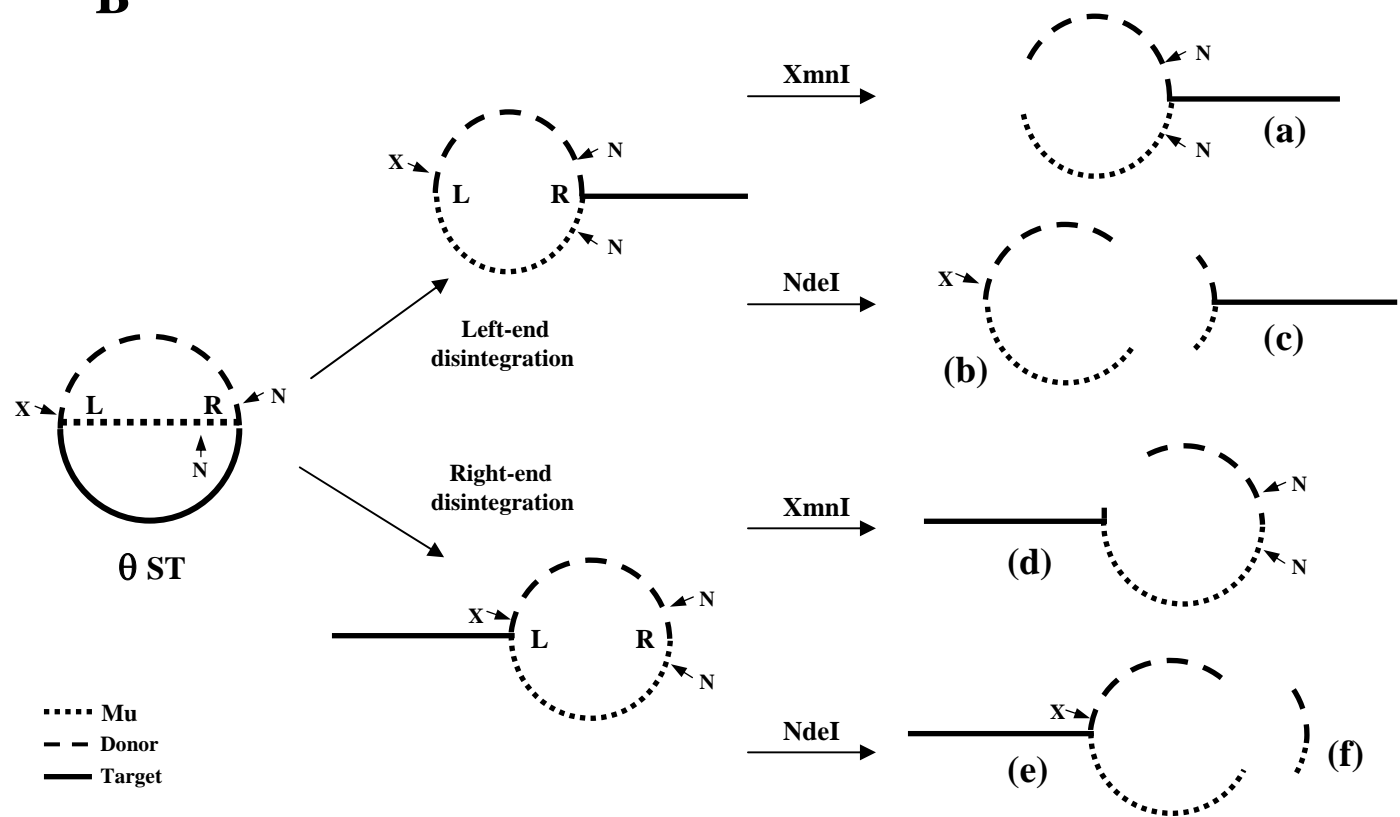

Supplementary Figure 2

Supplement: 7600344s3.pdf [file 7600344s3.pdf]

**A**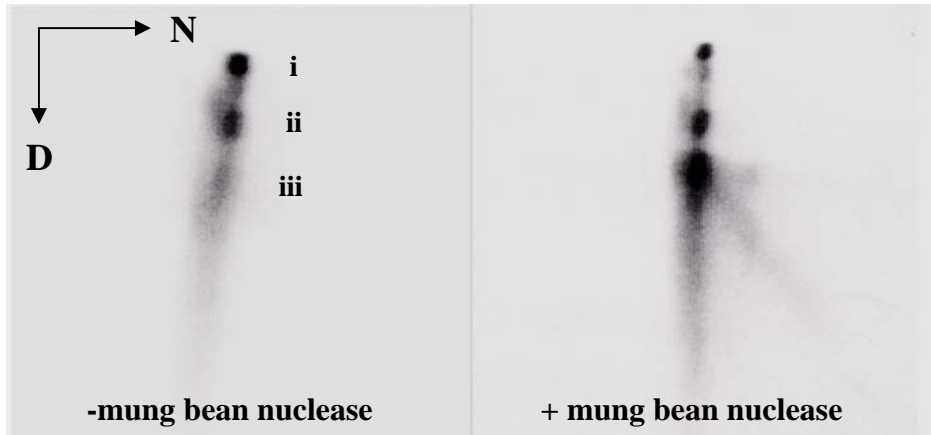**B**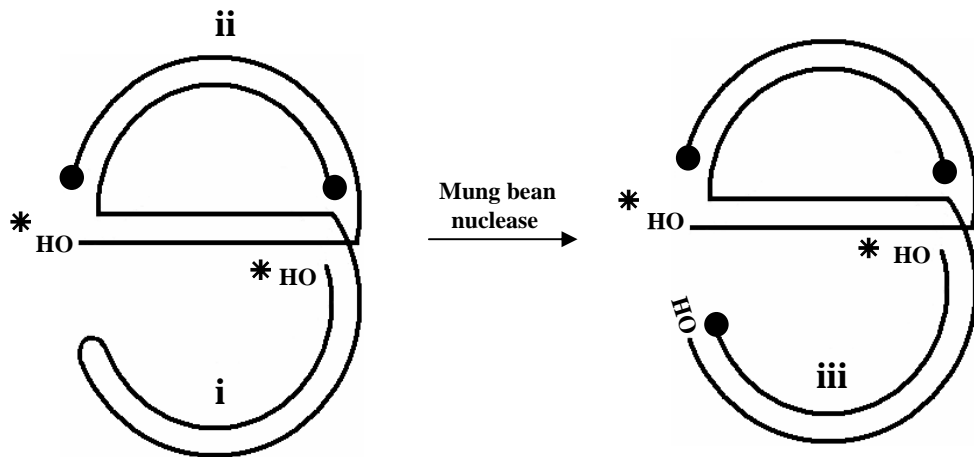**Supplementary Figure 3**

Supplement: 7600344s4.pdf [file 7600344s4.pdf]

**A**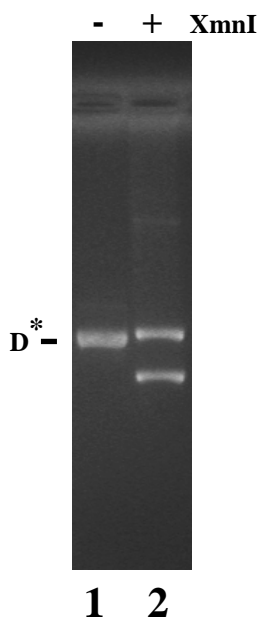**B**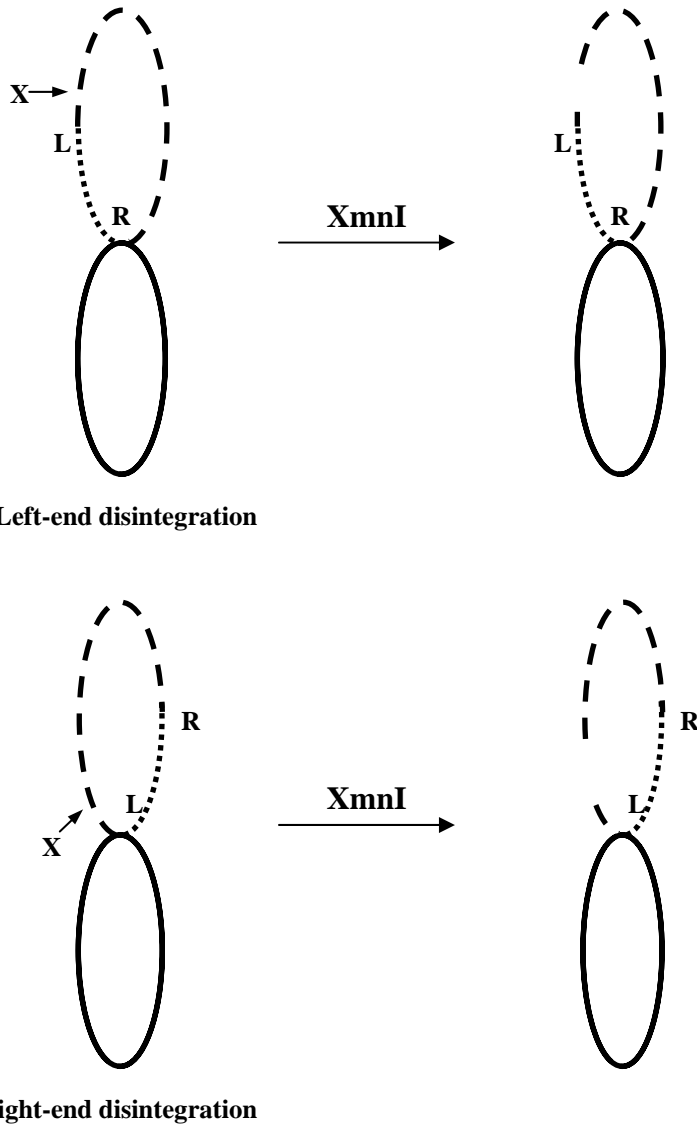

..... Mu  
 - - - Donor  
 ——— Target

**Supplementary Figure 4**

Supplement: 7600344s5.pdf [file 7600344s5.pdf]
